# Supplementary material for: Increased fibroblast growth factor-21 in chronic kidney disease is a trade-off between survival benefit and blood pressure dysregulation
Source: PubMed Central journal article supplement (PMC6917750; doi:10.1038/s41598-019-55643-4), 2019-12-17
Supplement: 41598_2019_55643_MOESM1_ESM.pdf [file 41598_2019_55643_MOESM1_ESM.pdf]

## Supplementary information

### **Increased fibroblast growth factor-21 in chronic kidney disease is a trade-off between survival benefit and blood pressure dysregulation**

Toshihiro Nakano<sup>1,2</sup>, Kazuhiro Shiizaki<sup>1</sup>, Yutaka Mirua<sup>1</sup>, Masahiro Matsui<sup>3</sup>, Keisei Kosaki<sup>4,5,6</sup>, Shoya Mori<sup>3</sup>, Kunihiro Yamagata<sup>7</sup>, Seiji Maeda<sup>5</sup>, Takuya Kishi<sup>8</sup>, Naoki Usui<sup>9</sup>, Masahide Yoshida<sup>9</sup>, Tatsushi Onaka<sup>9</sup>, Hiroaki Mizukami<sup>10</sup>, Ruri Kaneda<sup>1</sup>, Kazunori Karasawa<sup>2</sup>, Kosaku Nitta<sup>2</sup>, Hiroshi Kurosu<sup>1</sup>, and Makoto Kuro-o<sup>1,11,12,\*</sup>

<sup>1</sup>Division of Anti-aging Medicine, Center for Molecular Medicine, Jichi Medical University, Tochigi, Japan.

<sup>2</sup>Department of Medicine IV, Tokyo Women's Medical University, Tokyo, Japan.

<sup>3</sup> Graduate School of Comprehensive Human Sciences, University of Tsukuba, Ibaraki, Japan

<sup>4</sup> Faculty of Sport Sciences, Waseda University, Saitama, Japan

<sup>5</sup> Faculty of Health and Sport Sciences, University of Tsukuba, Ibaraki, Japan

<sup>6</sup> Japan Society for the Promotion of Science, Tokyo, Japan

<sup>7</sup> Department of Nephrology, Faculty of Medicine, University of Tsukuba, Ibaraki, Japan

<sup>8</sup> Faculty of Health and Welfare Sciences in Fukuoka, International University of Health and Welfare, Fukuoka, Japan.

<sup>9</sup> Division of Brain and Neurophysiology, Department of Physiology, Jichi Medical University, Tochigi, Japan.

<sup>10</sup> Division of Genetic Therapeutics, Center for Molecular Medicine, Jichi Medical University, Tochigi, Japan.

<sup>11</sup> Charles and Jane Pak Center for Mineral Metabolism and Clinical Research, Department of Internal Medicine, University of Texas Southwestern Medical Center, Dallas, Texas, USA.

<sup>12</sup> AMED-CREST, Japan Agency for Medical Research and Development, Tokyo, Japan.

\*Correspondence: Makoto Kuro-o, Division of Anti-aging Medicine, Center for Molecular Medicine, Jichi Medical University, 3311-1 Yakushiji, Shimotsuke, Tochigi 329-0498, Japan. Email: mkuroo@jichi.ac.jp

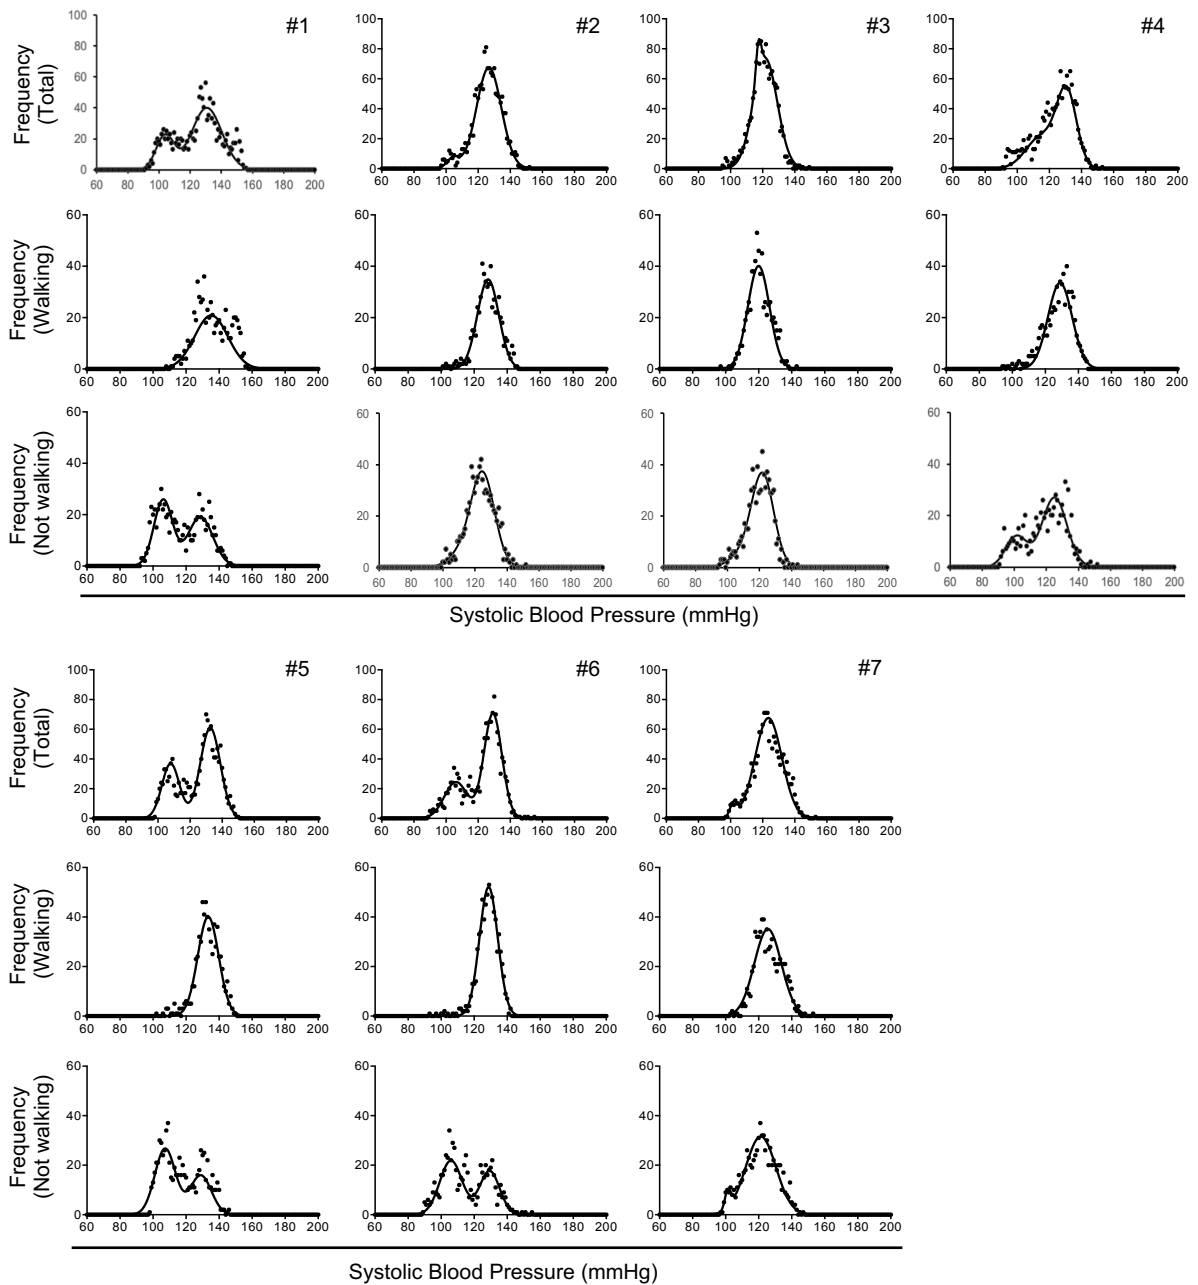

**Supplementary Figure S1.** Histograms of systolic blood pressure (SBP) in wild-type control mice during nighttime. SBP (top panels), SBP when the mouse was walking (moving horizontally, middle panels), and SBP when the mouse was not walking (moving vertically or not moving, bottom panels) were shown ( $N = 7$ ). The mean and the standard deviation of individual mice were shown in Supplementary Table S1-S3.

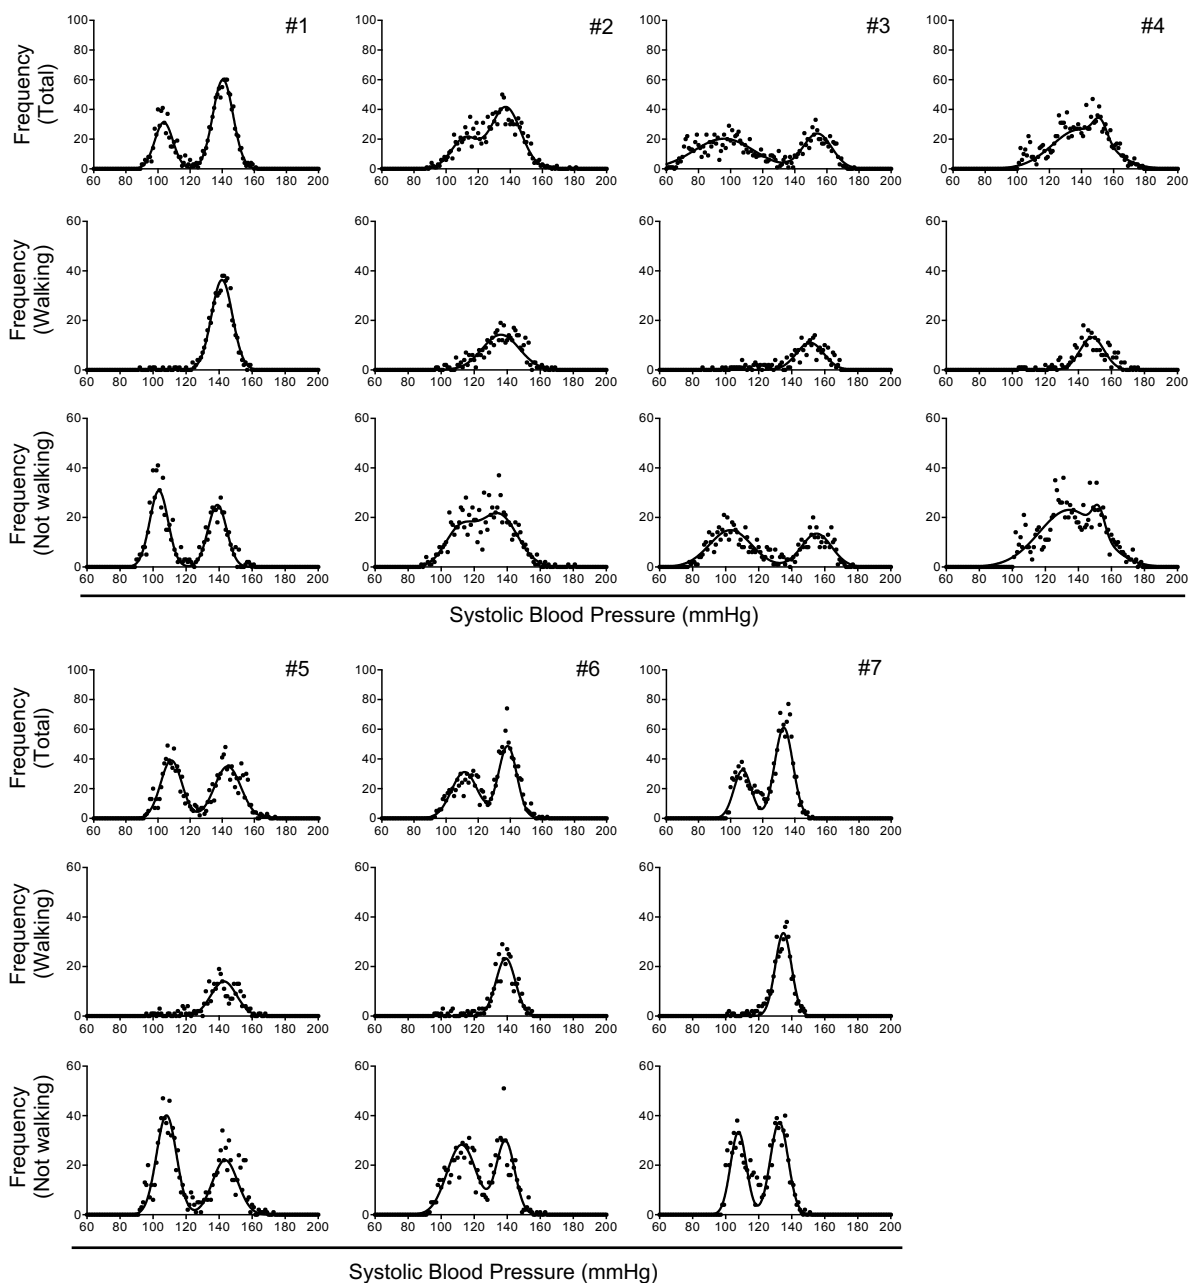

**Supplementary Figure S2.** Histograms of systolic blood pressure (SBP) in wild-type CKD mice during nighttime. SBP (top panels), SBP when the mouse was walking (moving horizontally, middle panels), and SBP when the mouse was not walking (moving vertically or not moving, bottom panels) were shown ( $N = 7$ ). The mean and the standard deviation of individual mice were shown in Supplementary Table S1-S3.

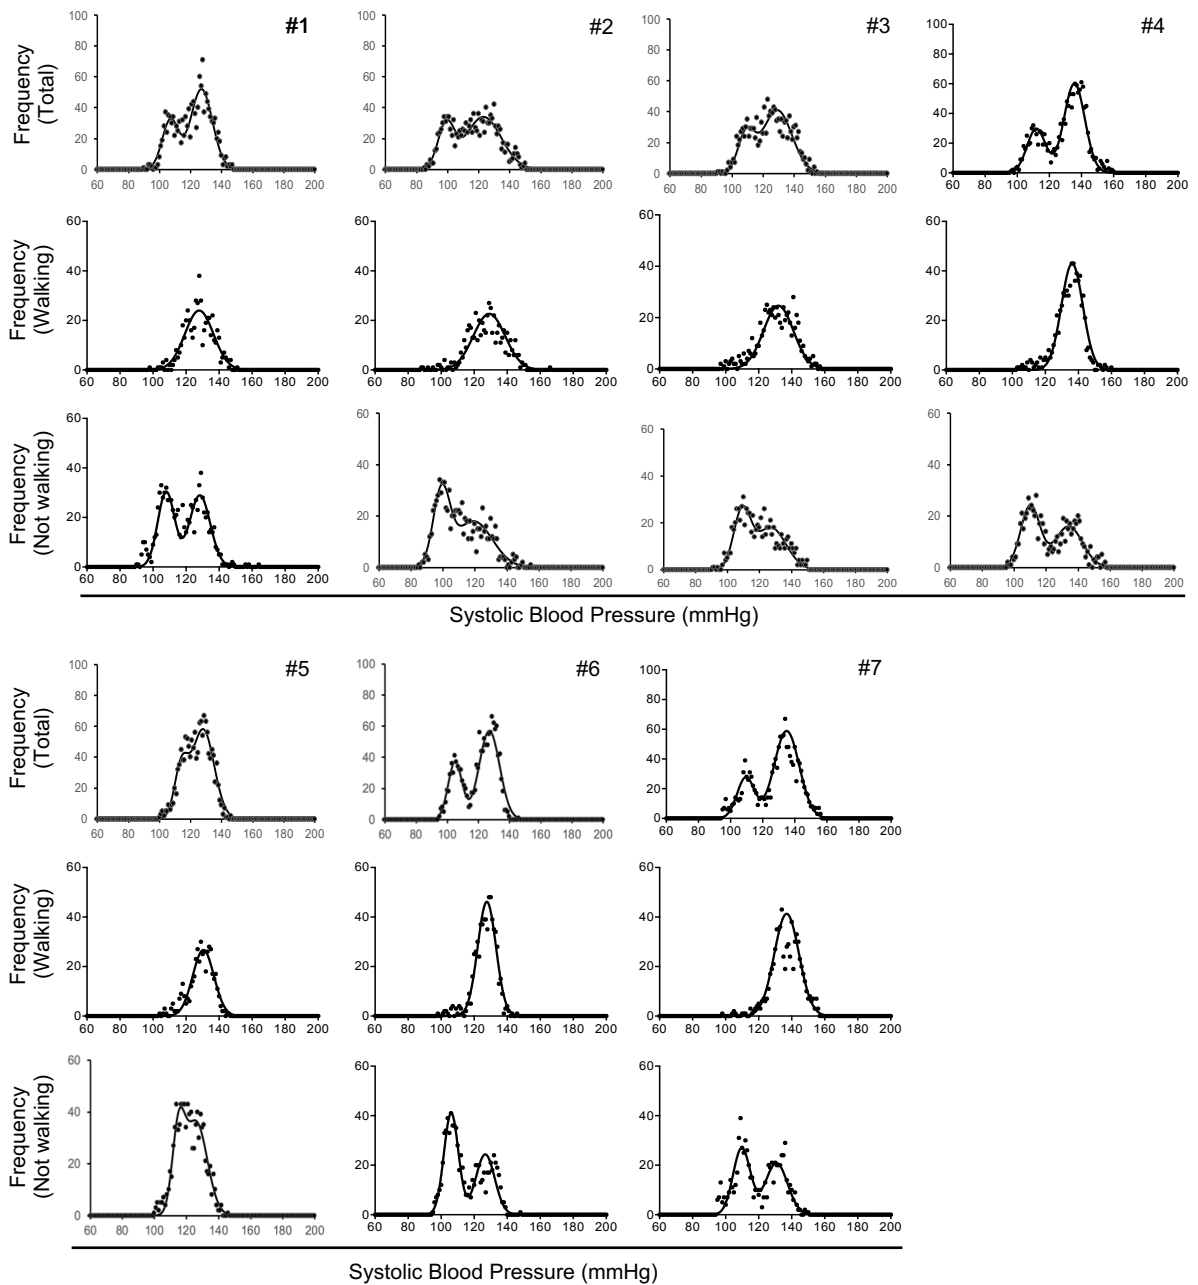

**Supplementary Figure S3.** Histograms of systolic blood pressure (SBP) in *Fgf21*<sup>-/-</sup> control mice during nighttime. SBP (top panels), SBP when the mouse was walking (moving horizontally, middle panels), and SBP when the mouse was not walking (moving vertically or not moving, bottom panels) were shown ( $N = 7$ ). The mean and the standard deviation of individual mice were shown in Supplementary Table S1-S3.

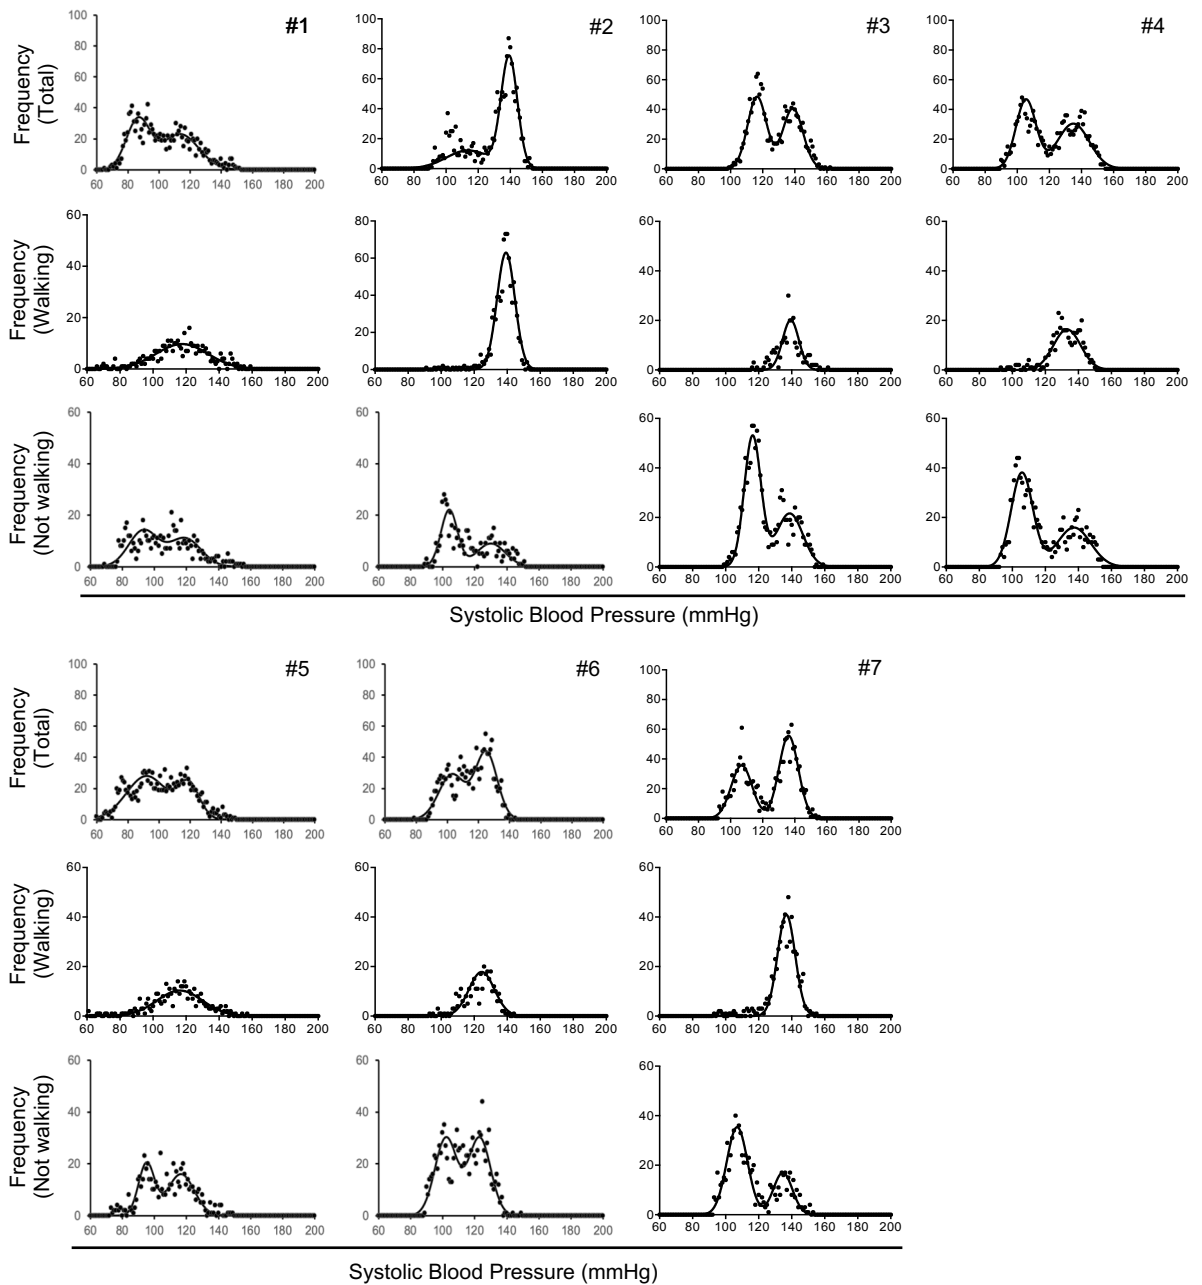

**Supplementary Figure S4.** Histograms of systolic blood pressure (SBP) in *Fgf21*<sup>-/-</sup> CKD mice during nighttime. SBP (top panels), SBP when the mouse was walking (moving horizontally, middle panels), and SBP when the mouse was not walking (moving vertically or not moving, bottom panels) were shown ( $N = 7$ ). The mean and the standard deviation of individual mice were shown in Supplementary Table S1-S3.

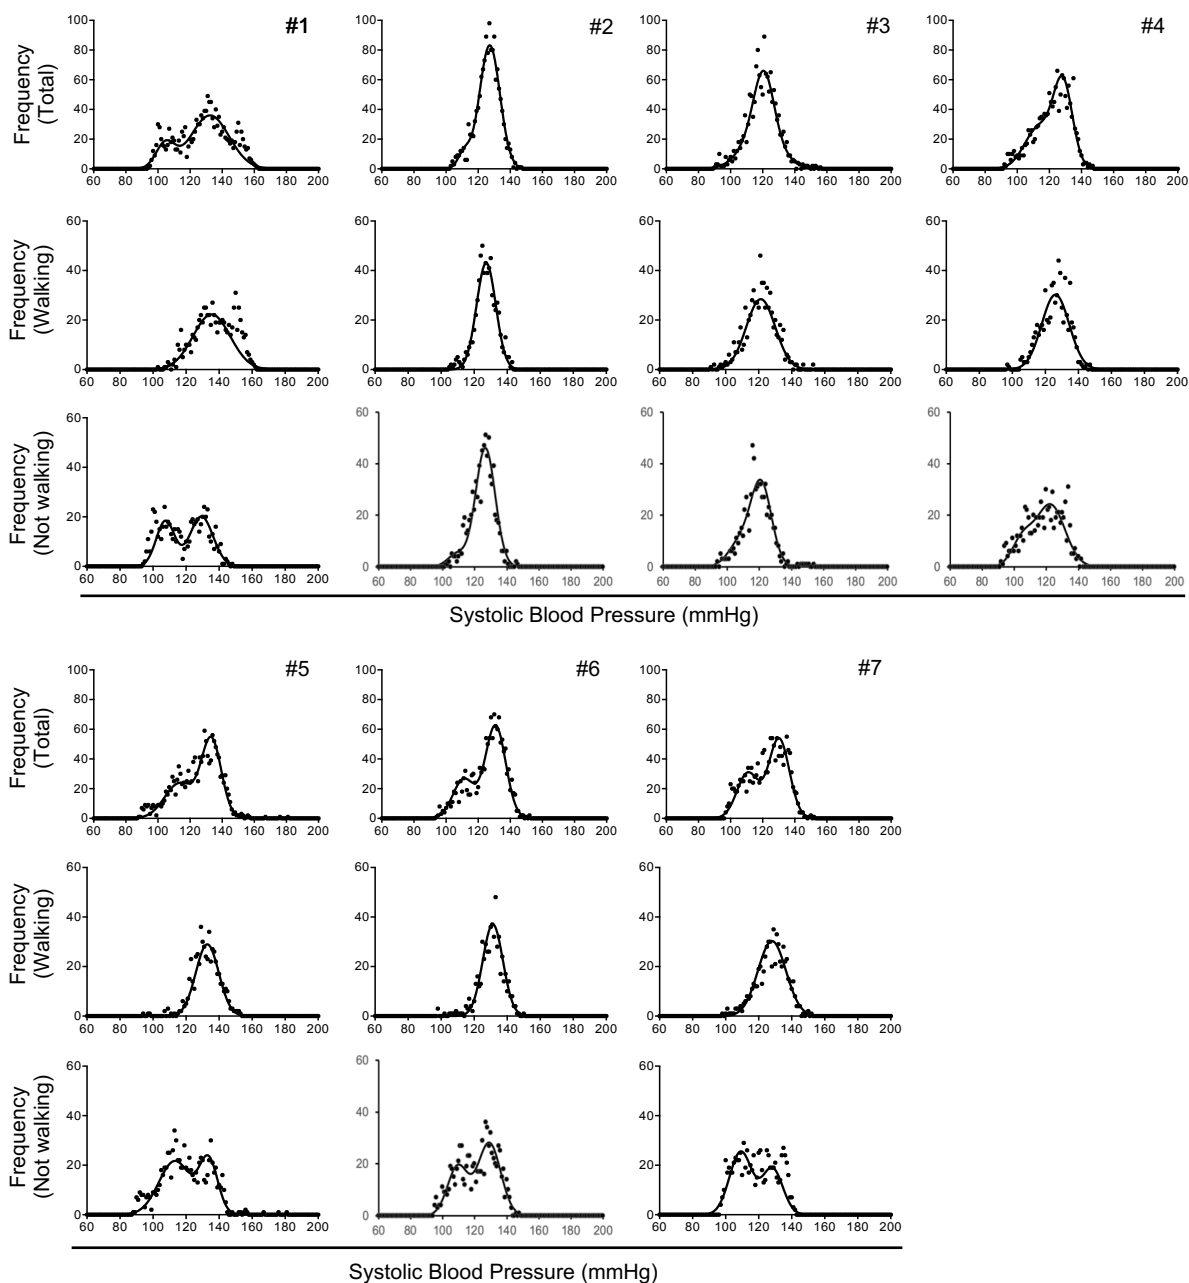

**Supplementary Figure S5.** Histograms of systolic blood pressure (SBP) in wild-type mice injected with the AAV8-LacZ during nighttime. SBP (top panels), SBP when the mouse was walking (moving horizontally, middle panels), and SBP when the mouse was not walking (moving vertically or not moving, bottom panels) were shown ( $N = 7$ ). The mean and the standard deviation of individual mice were shown in Supplementary Table S1-S3.

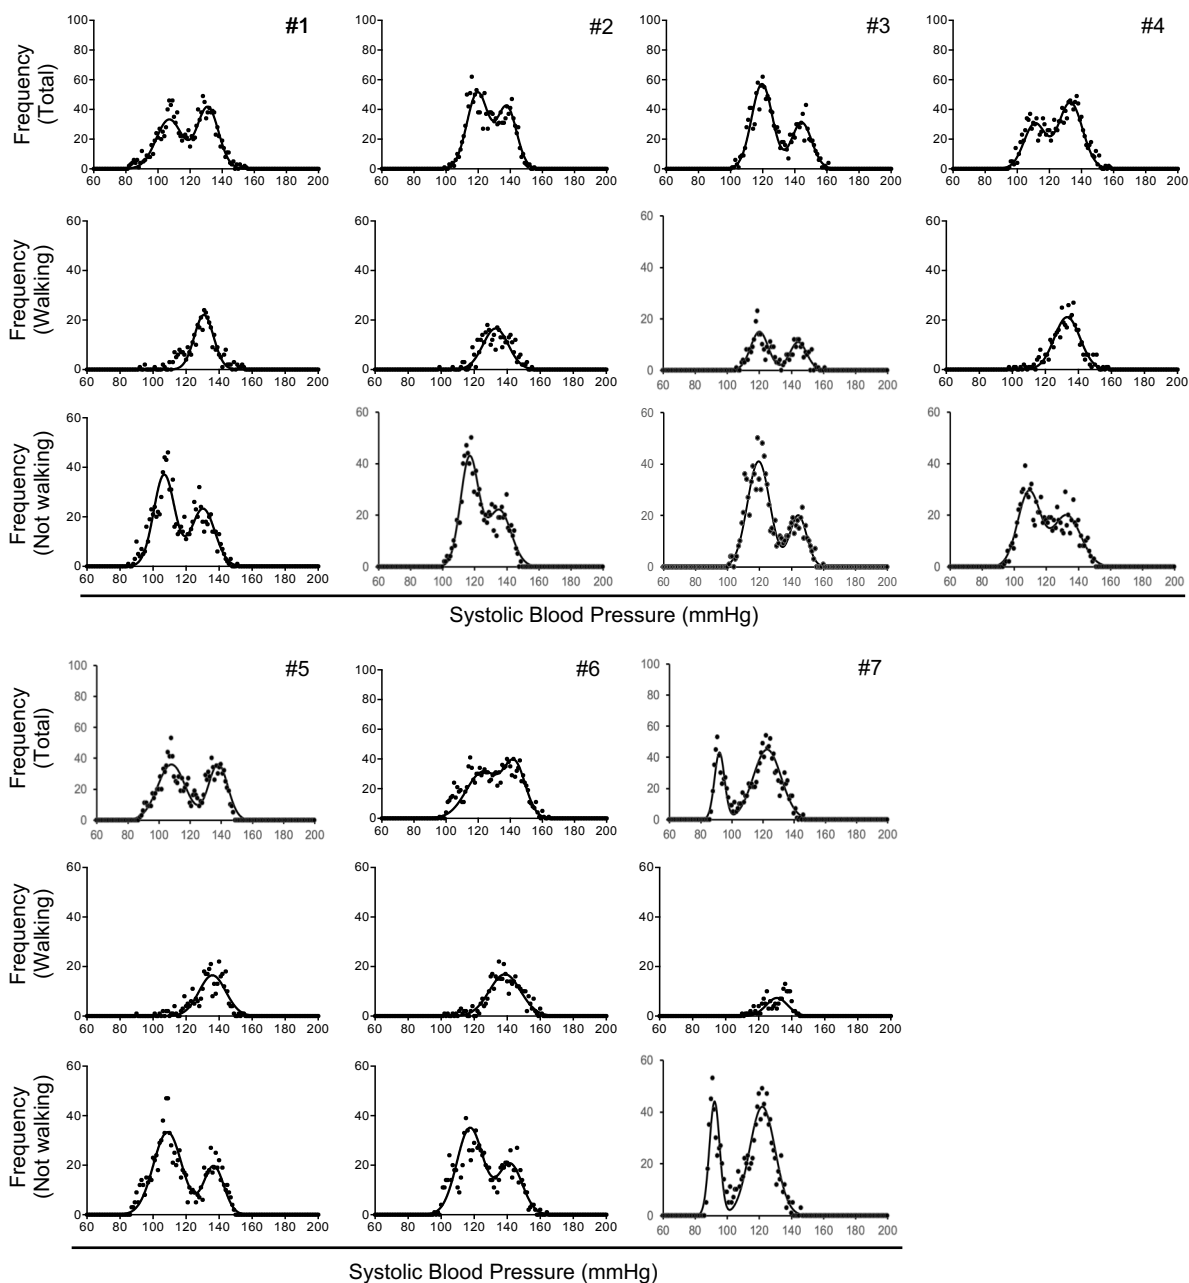

**Supplementary Figure S6.** Histograms of systolic blood pressure (SBP) in wild-type mice injected with the AAV8-FGF21 during nighttime. SBP (top panels), SBP when the mouse was walking (moving horizontally, middle panels), and SBP when the mouse was not walking (moving vertically or not moving, bottom panels) were shown ( $N = 7$ ). The mean and the standard deviation of individual mice were shown in Supplementary Table S1-S3.

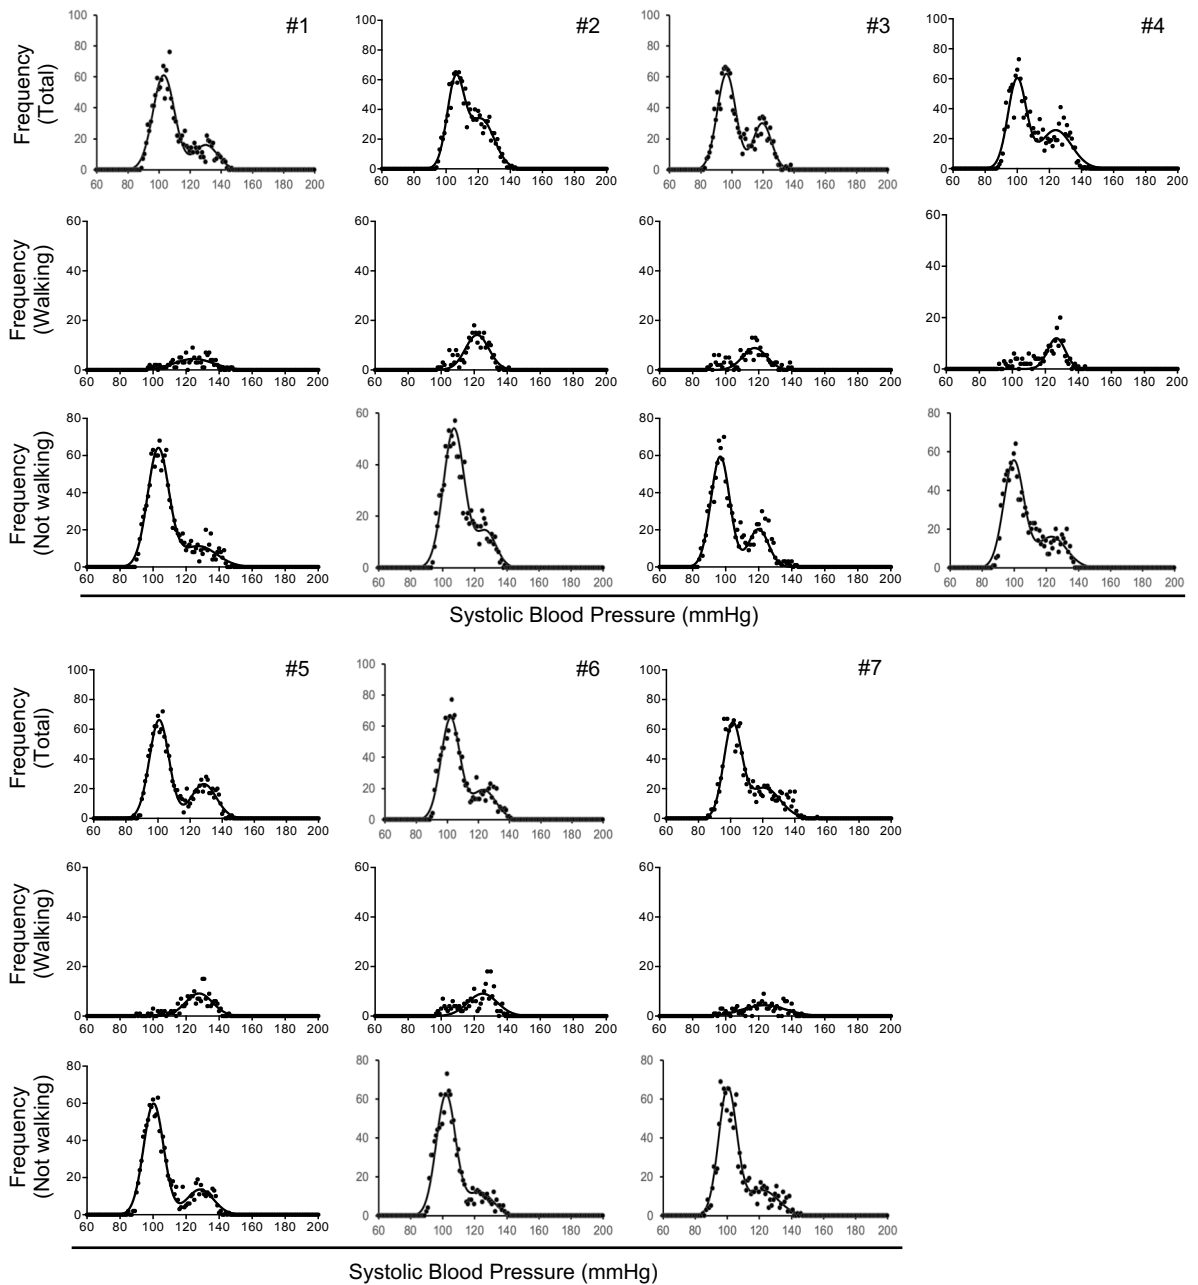

**Supplementary Figure S7.** Histograms of systolic blood pressure (SBP) in wild-type control mice during daytime. SBP (top panels), SBP when the mouse was walking (moving horizontally, middle panels), and SBP when the mouse was not walking (moving vertically or not moving, bottom panels) were shown ( $N = 7$ ). The mean and the standard deviation of individual mice were shown in Supplementary Table S4-S6.



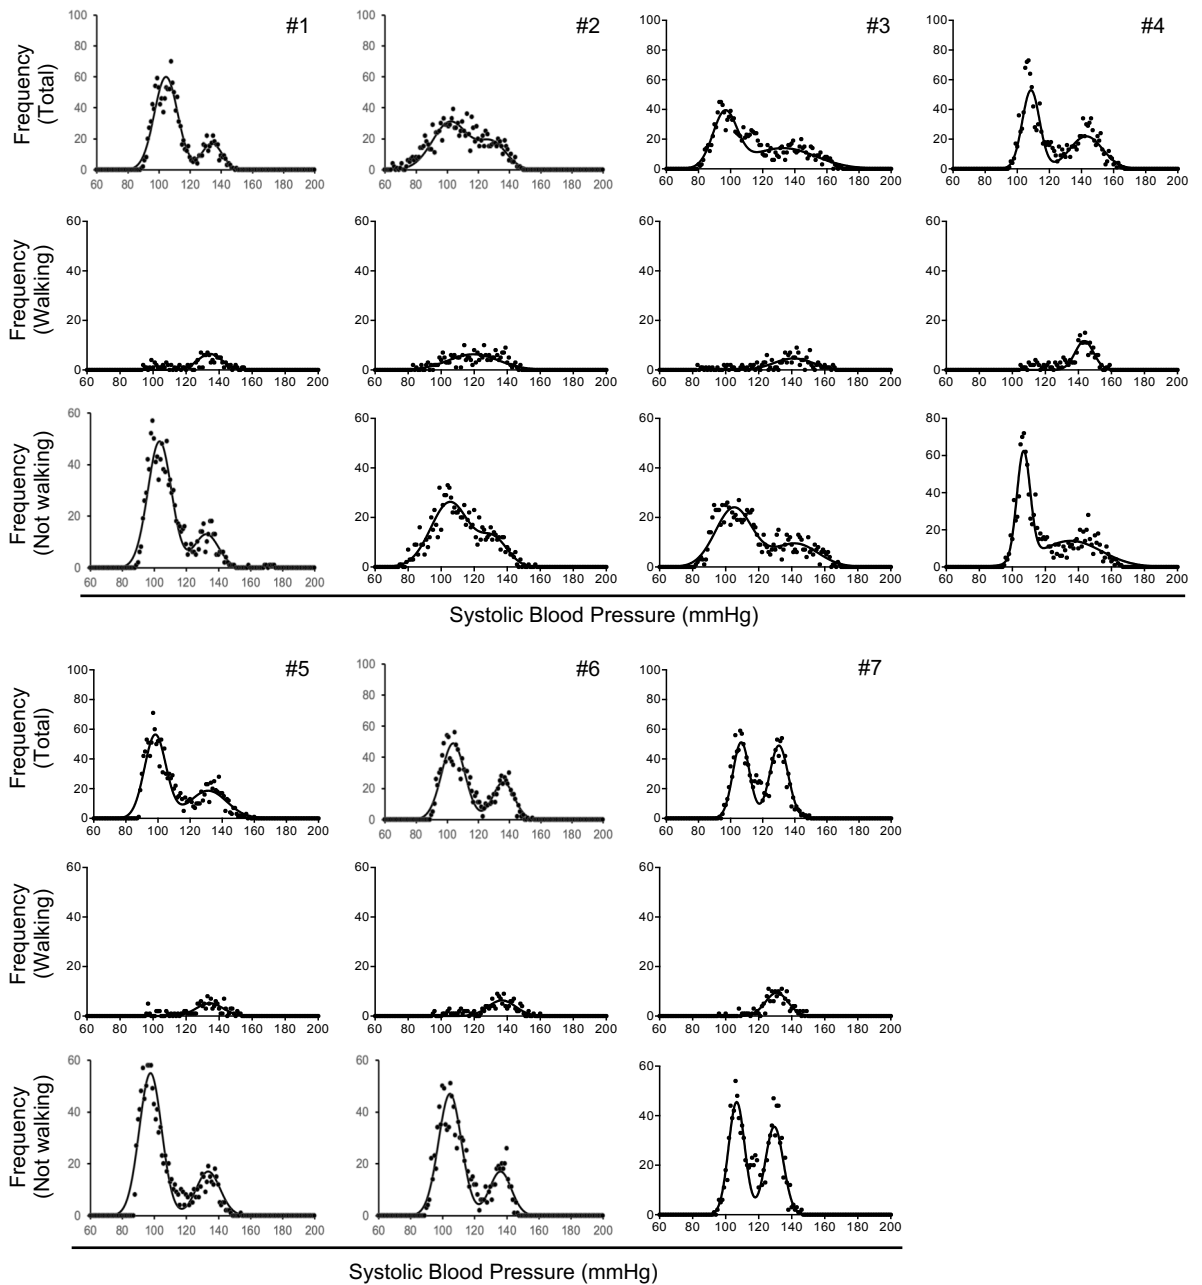

**Supplementary Figure S8.** Histograms of systolic blood pressure (SBP) in wild-type CKD mice during daytime. SBP (top panels), SBP when the mouse was walking (moving horizontally, middle panels), and SBP when the mouse was not walking (moving vertically or not moving, bottom panels) were shown ( $N = 7$ ). The mean and the standard deviation of individual mice were shown in Supplementary Table S4-S6.

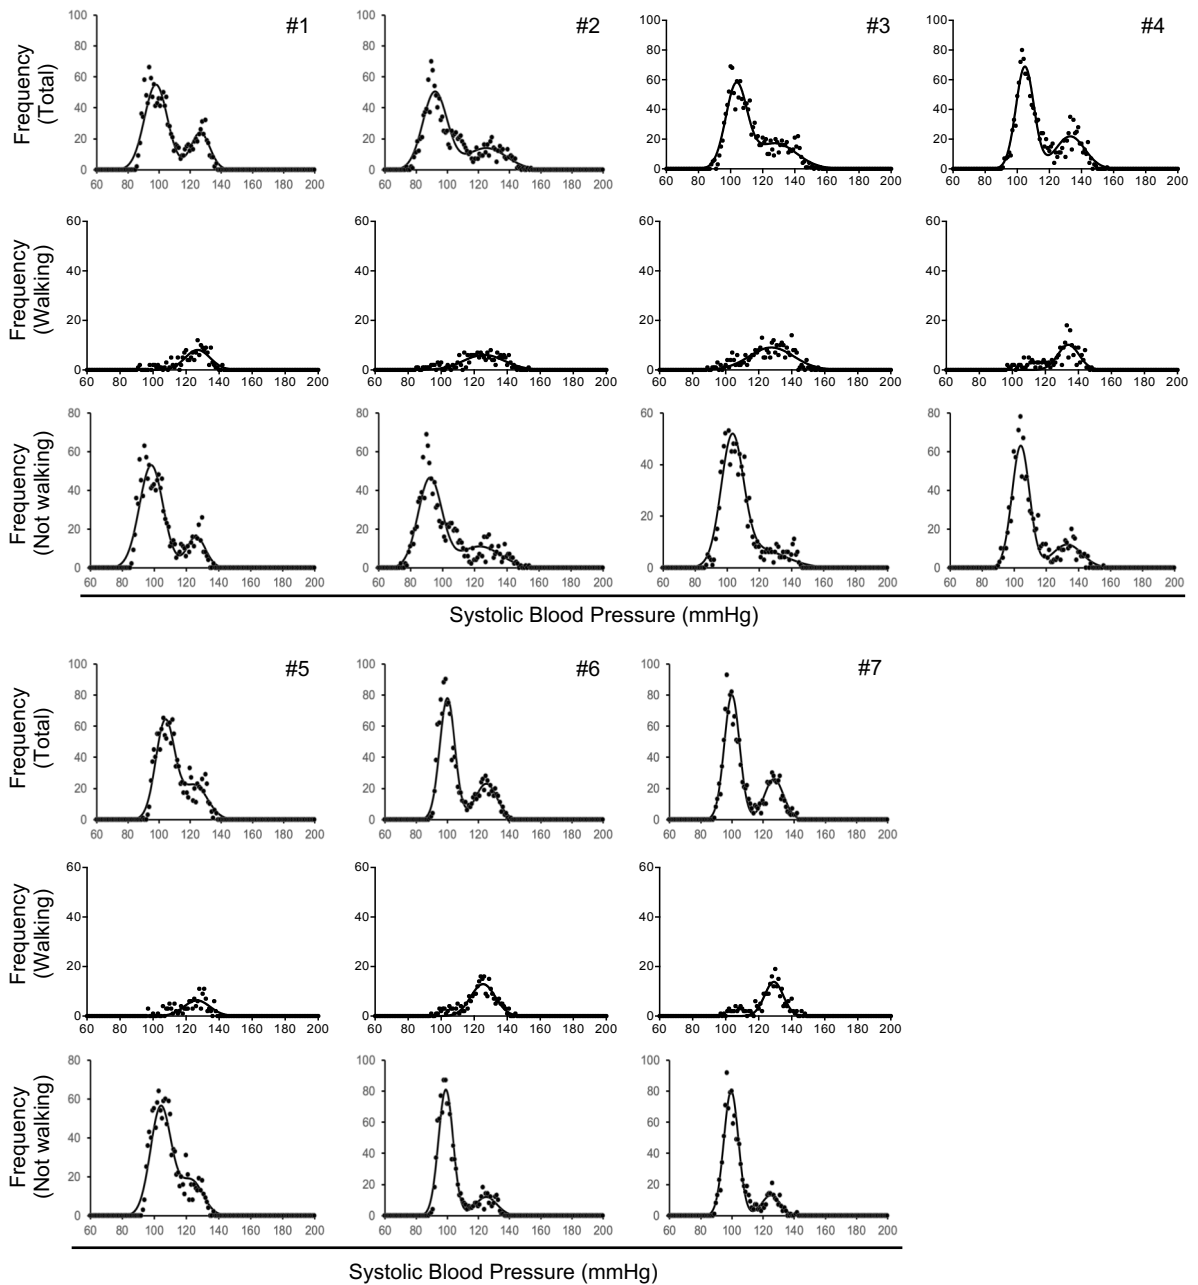

**Supplementary Figure S9.** Histograms of systolic blood pressure (SBP) in *Fgf21*<sup>-/-</sup> control mice during daytime. SBP (top panels), SBP when the mouse was walking (moving horizontally, middle panels), and SBP when the mouse was not walking (moving vertically or not moving, bottom panels) were shown ( $N = 7$ ). The mean and the standard deviation of individual mice were shown in Supplementary Table S4-S6.

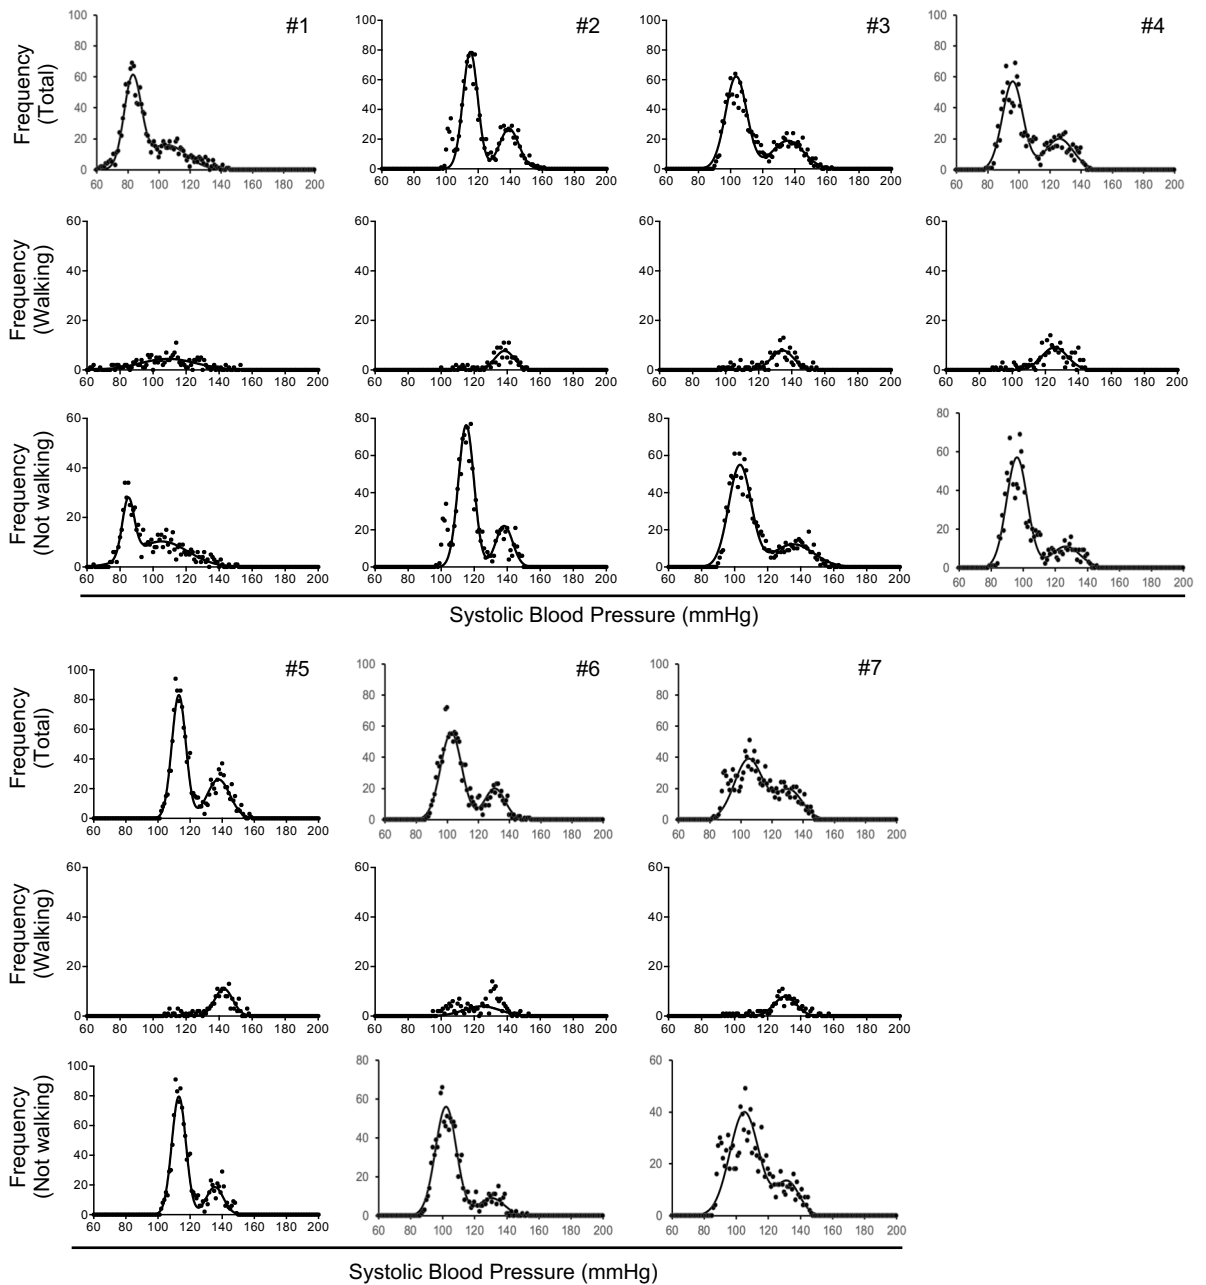

**Supplementary Figure S10.** Histograms of systolic blood pressure (SBP) in *Fgf21*<sup>-/-</sup> CKD mice during daytime. SBP (top panels), SBP when the mouse was walking (moving horizontally, middle panels), and SBP when the mouse was not walking (moving vertically or not moving, bottom panels) were shown ( $N = 7$ ). The mean and the standard deviation of individual mice were shown in Supplementary Table S4-S6.

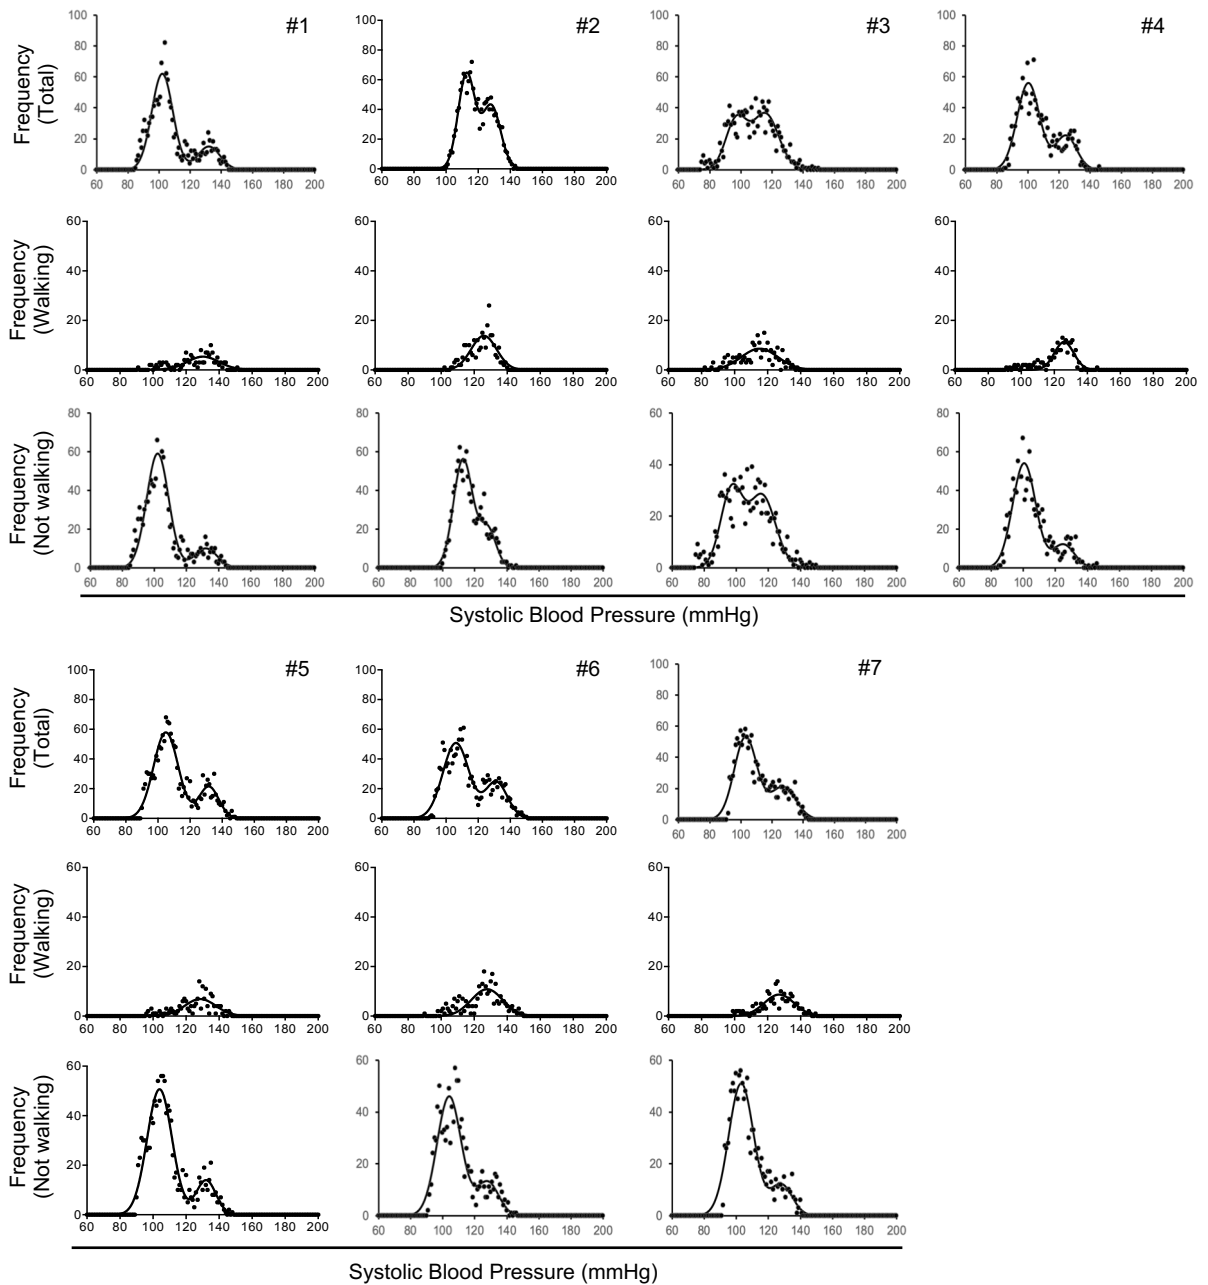

**Supplementary Figure S11.** Histograms of systolic blood pressure (SBP) in wild-type mice injected with the AAV8-LacZ during daytime. SBP (top panels), SBP when the mouse was walking (moving horizontally, middle panels), and SBP when the mouse was not walking (moving vertically or not moving, bottom panels) were shown ( $N = 7$ ). The mean and the standard deviation of individual mice were shown in Supplementary Table S4-S6.

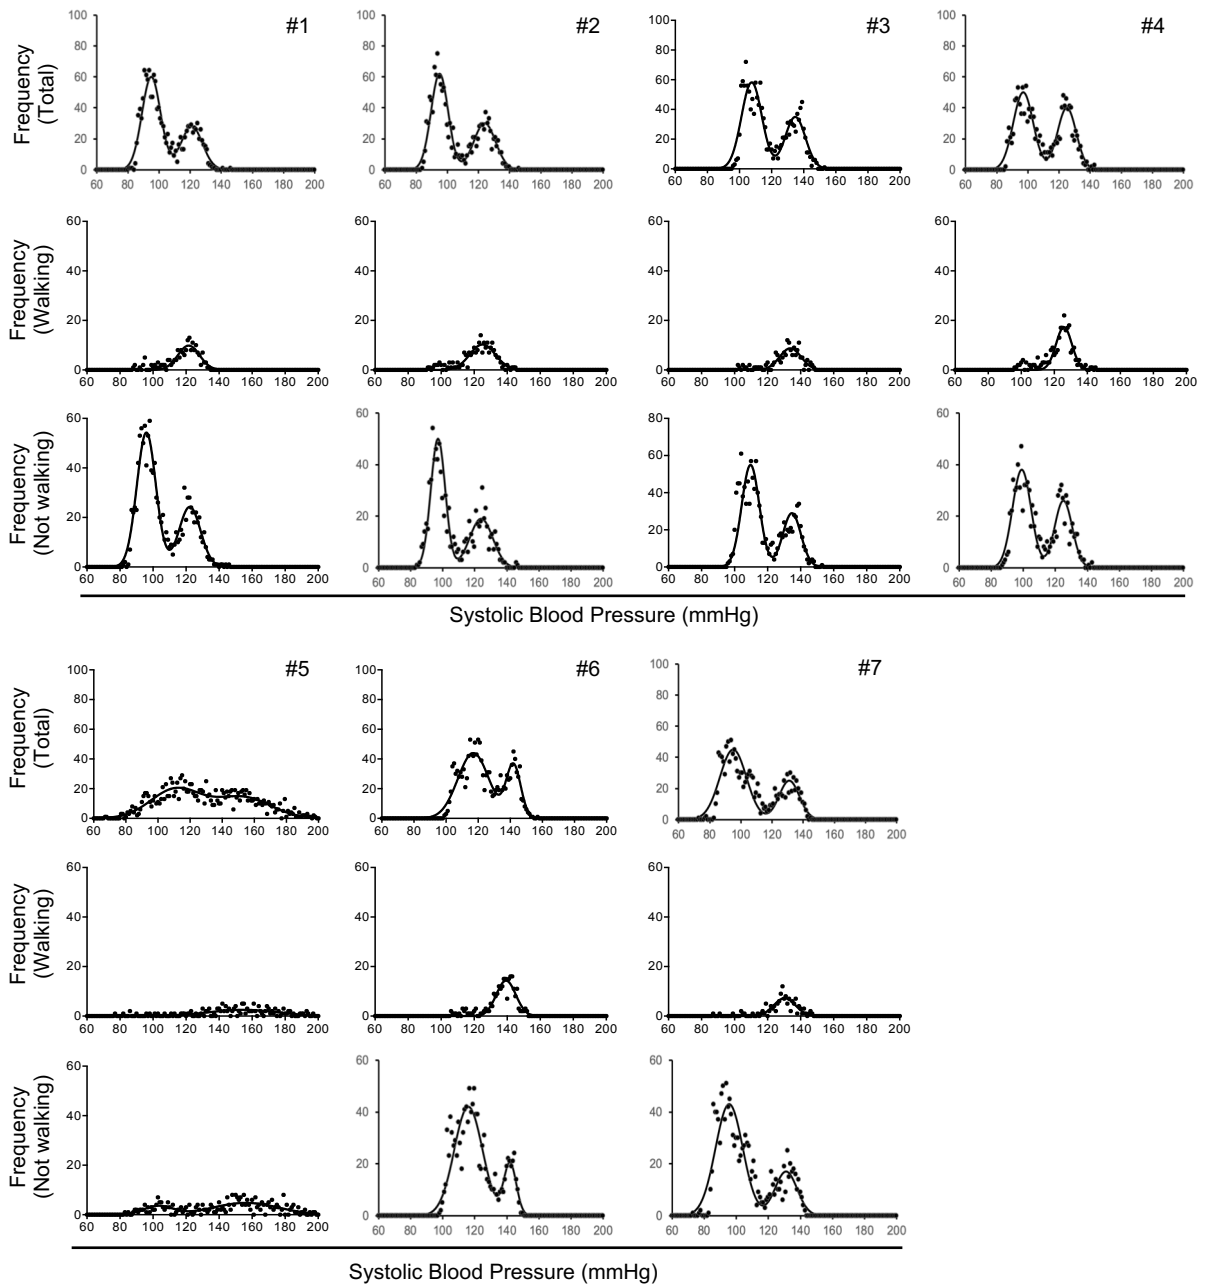

**Supplementary Figure S12.** Histograms of systolic blood pressure (SBP) in wild-type mice injected with the AAV8-FGF21 during daytime. SBP (top panels), SBP when the mouse was walking (moving horizontally, middle panels), and SBP when the mouse was not walking (moving vertically or not moving, bottom panels) were shown ( $N = 7$ ). The mean and the standard deviation of individual mice were shown in Supplementary Table S4-S6.

**Supplementary Table S1. Mean and standard deviation (SD) of D1 and D2 in the nighttime**

| Nighttime     | D1    |     | D2    |     |
|---------------|-------|-----|-------|-----|
|               | Mean  | SD  | Mean  | SD  |
| WT Control #1 | 103.0 | 7.0 | 130.0 | 7.6 |
| WT Control #2 | 106.0 | 5.4 | 122.0 | 8.0 |
| WT Control #3 | 96.5  | 6.0 | 119.5 | 5.9 |
| WT Control #4 | 99.9  | 5.7 | 124.0 | 9.8 |
| WT Control #5 | 100.8 | 6.1 | 128.6 | 7.8 |
| WT Control #6 | 102.0 | 6.1 | 123.3 | 7.8 |
| WT Control #7 | 101.2 | 5.6 | 121.0 | 9.9 |
| Average       | 101.3 | 6.0 | 124.1 | 8.1 |

| Nighttime | D1    |      | D2    |      |
|-----------|-------|------|-------|------|
|           | Mean  | SD   | Mean  | SD   |
| WT CKD #1 | 104.5 | 7.5  | 134.0 | 6.5  |
| WT CKD #2 | 102.0 | 11.3 | 129.0 | 9.1  |
| WT CKD #3 | 96.5  | 7.5  | 132.6 | 20.4 |
| WT CKD #4 | 108.6 | 5.4  | 143.0 | 10.3 |
| WT CKD #5 | 98.3  | 6.7  | 131.4 | 11.6 |
| WT CKD #6 | 103.8 | 7.5  | 136.0 | 6.9  |
| WT CKD #7 | 106.7 | 5.2  | 130.1 | 5.8  |
| Average   | 102.9 | 7.3  | 133.7 | 10.1 |

| Nighttime                       | D1    |      | D2    |      |
|---------------------------------|-------|------|-------|------|
|                                 | Mean  | SD   | Mean  | SD   |
| Fgf21 <sup>-/-</sup> Control #1 | 98.0  | 7.4  | 126.5 | 6.1  |
| Fgf21 <sup>-/-</sup> Control #2 | 92.0  | 7.8  | 125.0 | 13.0 |
| Fgf21 <sup>-/-</sup> Control #3 | 127.9 | 13.2 | 103.6 | 6.6  |
| Fgf21 <sup>-/-</sup> Control #4 | 133.0 | 9.1  | 104.8 | 5.6  |
| Fgf21 <sup>-/-</sup> Control #5 | 104.0 | 6.1  | 123.0 | 8.1  |
| Fgf21 <sup>-/-</sup> Control #6 | 100.0 | 4.9  | 125.0 | 6.9  |
| Fgf21 <sup>-/-</sup> Control #7 | 100.0 | 4.9  | 127.0 | 6.1  |
| Average                         | 107.8 | 7.6  | 119.3 | 7.5  |

| Nighttime                   | D1    |     | D2    |      |
|-----------------------------|-------|-----|-------|------|
|                             | Mean  | SD  | Mean  | SD   |
| Fgf21 <sup>-/-</sup> CKD #1 | 86.5  | 7.6 | 113.5 | 12.0 |
| Fgf21 <sup>-/-</sup> CKD #2 | 115.1 | 4.6 | 139.3 | 6.1  |
| Fgf21 <sup>-/-</sup> CKD #3 | 135.7 | 9.8 | 103.5 | 6.6  |
| Fgf21 <sup>-/-</sup> CKD #4 | 96.0  | 6.6 | 126.0 | 8.9  |
| Fgf21 <sup>-/-</sup> CKD #5 | 113.0 | 4.4 | 137.7 | 7.1  |
| Fgf21 <sup>-/-</sup> CKD #6 | 102.5 | 6.8 | 130.5 | 6.5  |
| Fgf21 <sup>-/-</sup> CKD #7 | 105.0 | 9.1 | 131.0 | 8.4  |
| Average                     | 107.7 | 7.0 | 125.9 | 7.9  |

| Nighttime       | D1    |     | D2    |     |
|-----------------|-------|-----|-------|-----|
|                 | Mean  | SD  | Mean  | SD  |
| WT AAV8-LacZ #1 | 102.1 | 6.8 | 132.0 | 7.2 |
| WT AAV8-LacZ #2 | 112.7 | 5.2 | 128.1 | 5.8 |
| WT AAV8-LacZ #3 | 97.0  | 6.8 | 115.8 | 8.4 |
| WT AAV8-LacZ #4 | 100.3 | 7.2 | 124.4 | 6.8 |
| WT AAV8-LacZ #5 | 104.9 | 7.7 | 131.7 | 6.1 |
| WT AAV8-LacZ #6 | 106.2 | 8.1 | 131.2 | 6.9 |
| WT AAV8-LacZ #7 | 103.0 | 7.3 | 127.0 | 8.2 |
| Average         | 103.7 | 7.0 | 127.2 | 7.1 |

| Nighttime        | D1    |      | D2    |      |
|------------------|-------|------|-------|------|
|                  | Mean  | SD   | Mean  | SD   |
| WT AAV8-FGF21 #1 | 95.0  | 6.0  | 121.0 | 6.9  |
| WT AAV8-FGF21 #2 | 95.0  | 5.5  | 124.0 | 7.0  |
| WT AAV8-FGF21 #3 | 107.6 | 6.3  | 134.8 | 6.3  |
| WT AAV8-FGF21 #4 | 97.0  | 6.4  | 125.0 | 6.0  |
| WT AAV8-FGF21 #5 | 111.2 | 15.6 | 152.7 | 17.3 |
| WT AAV8-FGF21 #6 | 117.0 | 9.7  | 142.0 | 4.5  |
| WT AAV8-FGF21 #7 | 95.0  | 8.5  | 131.0 | 6.5  |
| Average          | 102.5 | 8.3  | 132.9 | 7.8  |

**Supplementary Table S2. Mean and standard deviation (SD) of D1 and D2 during “walking” in the nighttime**

| Nighttime<br>“Walking” | D1   |    | D2    |      |
|------------------------|------|----|-------|------|
|                        | Mean | SD | Mean  | SD   |
| WT Control #1          | -    | -  | 135.3 | 10.1 |
| WT Control #2          | -    | -  | 128.5 | 6.5  |
| WT Control #3          | -    | -  | 120.0 | 6.5  |
| WT Control #4          | -    | -  | 128.9 | 7.3  |
| WT Control #5          | -    | -  | 133.4 | 6.3  |
| WT Control #6          | -    | -  | 128.8 | 5.6  |
| WT Control #7          | -    | -  | 125.6 | 8.2  |
| Average                |      |    | 128.6 | 7.2  |

| Nighttime<br>“Walking” | D1   |    | D2    |      |
|------------------------|------|----|-------|------|
|                        | Mean | SD | Mean  | SD   |
| WT CKD #1              | -    | -  | 141.8 | 6.4  |
| WT CKD #2              | -    | -  | 136.2 | 11.2 |
| WT CKD #3              | -    | -  | 151.1 | 8.3  |
| WT CKD #4              | -    | -  | 148.3 | 7.3  |
| WT CKD #5              | -    | -  | 142.9 | 7.7  |
| WT CKD #6              | -    | -  | 139.1 | 5.8  |
| WT CKD #7              | -    | -  | 135.0 | 4.9  |
| Average                |      |    | 142.1 | 7.4  |

| Nighttime<br>“Walking”          | D1   |    | D2    |     |
|---------------------------------|------|----|-------|-----|
|                                 | Mean | SD | Mean  | SD  |
| Fgf21 <sup>-/-</sup> Control #1 | -    | -  | 128.0 | 8.7 |
| Fgf21 <sup>-/-</sup> Control #2 | -    | -  | 129.1 | 9.6 |
| Fgf21 <sup>-/-</sup> Control #3 | -    | -  | 132.0 | 9.0 |
| Fgf21 <sup>-/-</sup> Control #4 | -    | -  | 136.2 | 6.5 |
| Fgf21 <sup>-/-</sup> Control #5 | -    | -  | 130.5 | 6.5 |
| Fgf21 <sup>-/-</sup> Control #6 | -    | -  | 127.7 | 5.5 |
| Fgf21 <sup>-/-</sup> Control #7 | -    | -  | 137.0 | 7.5 |
| Average                         |      |    | 131.5 | 7.6 |



| Nighttime<br>"Walking"      | D1   |    | D2    |      |
|-----------------------------|------|----|-------|------|
|                             | Mean | SD | Mean  | SD   |
| Fgf21 <sup>-/-</sup> CKD #1 | -    | -  | 117.5 | 15.8 |
| Fgf21 <sup>-/-</sup> CKD #2 | -    | -  | 139.3 | 5.4  |
| Fgf21 <sup>-/-</sup> CKD #3 | -    | -  | 139.4 | 4.9  |
| Fgf21 <sup>-/-</sup> CKD #4 | -    | -  | 133.2 | 8.3  |
| Fgf21 <sup>-/-</sup> CKD #5 | -    | -  | 116.2 | 13.9 |
| Fgf21 <sup>-/-</sup> CKD #6 | -    | -  | 124.6 | 7.7  |
| Fgf21 <sup>-/-</sup> CKD #7 | -    | -  | 136.8 | 5.3  |
| Average                     |      |    | 129.6 | 8.8  |

| Nighttime<br>"Walking" | D1   |    | D2    |      |
|------------------------|------|----|-------|------|
|                        | Mean | SD | Mean  | SD   |
| WT AAV8-LacZ #1        | -    | -  | 135.5 | 11.3 |
| WT AAV8-LacZ #2        | -    | -  | 127.3 | 5.8  |
| WT AAV8-LacZ #3        | -    | -  | 121.3 | 8.8  |
| WT AAV8-LacZ #4        | -    | -  | 126.1 | 8.3  |
| WT AAV8-LacZ #5        | -    | -  | 132.9 | 7.0  |
| WT AAV8-LacZ #6        | -    | -  | 131.3 | 6.1  |
| WT AAV8-LacZ #7        | -    | -  | 128.0 | 8.5  |
| Average                |      |    | 128.9 | 8.0  |

| Nighttime<br>"Walking" | D1   |    | D2    |     |
|------------------------|------|----|-------|-----|
|                        | Mean | SD | Mean  | SD  |
| WT AAV8-FGF21 #1       | -    | -  | 130.8 | 5.8 |
| WT AAV8-FGF21 #2       | -    | -  | 133.0 | 7.6 |
| WT AAV8-FGF21 #3       | -    | -  | 144.2 | 5.3 |
| WT AAV8-FGF21 #4       | -    | -  | 133.2 | 7.8 |
| WT AAV8-FGF21 #5       | -    | -  | 136.0 | 8.1 |
| WT AAV8-FGF21 #6       | -    | -  | 138.6 | 9.4 |
| WT AAV8-FGF21 #7       | -    | -  | 131.1 | 6.5 |
|                        |      |    | 135.3 | 7.2 |

**Supplementary Table S3. Mean and standard deviation (SD) of D1 and D2 during “not walking” in the nighttime**

| Nighttime<br>“Not walking” | D1    |     | D2    |     |
|----------------------------|-------|-----|-------|-----|
|                            | Mean  | SD  | Mean  | SD  |
| WT Control #1              | 106.2 | 5.7 | 128.7 | 7.6 |
| WT Control #2              | 109.0 | 7.1 | 124.5 | 7.5 |
| WT Control #3              | 110.0 | 8.5 | 122.0 | 6.9 |
| WT Control #4              | 101.4 | 6.7 | 125.0 | 7.8 |
| WT Control #5              | 107.4 | 6.2 | 128.9 | 6.4 |
| WT Control #6              | 106.0 | 6.8 | 129.4 | 6.1 |
| WT Control #7              | 101.4 | 1.8 | 121.3 | 9.2 |
| Average                    | 105.9 | 6.1 | 125.7 | 7.3 |

| Nighttime<br>“Not walking” | D1    |      | D2    |      |
|----------------------------|-------|------|-------|------|
|                            | Mean  | SD   | Mean  | SD   |
| WT CKD #1                  | 103.6 | 5.5  | 139.0 | 5.7  |
| WT CKD #2                  | 111.5 | 9.2  | 134.9 | 11.2 |
| WT CKD #3                  | 103.0 | 12.7 | 155.1 | 9.1  |
| WT CKD #4                  | 134.6 | 18.3 | 152.2 | 3.7  |
| WT CKD #5                  | 108.1 | 6.1  | 143.7 | 7.6  |
| WT CKD #6                  | 112.4 | 8.9  | 138.9 | 5.6  |
| WT CKD #7                  | 107.8 | 4.8  | 132.5 | 5.4  |
| Average                    | 111.6 | 9.3  | 142.3 | 6.9  |

| Nighttime<br>“Not walking”      | D1    |     | D2    |      |
|---------------------------------|-------|-----|-------|------|
|                                 | Mean  | SD  | Mean  | SD   |
| Fgf21 <sup>-/-</sup> Control #1 | 108.0 | 5.1 | 128.3 | 6.3  |
| Fgf21 <sup>-/-</sup> Control #2 | 99.0  | 5.2 | 119.0 | 11.8 |
| Fgf21 <sup>-/-</sup> Control #3 | 109.0 | 5.3 | 127.0 | 9.5  |
| Fgf21 <sup>-/-</sup> Control #4 | 110.0 | 6.0 | 134.0 | 8.7  |
| Fgf21 <sup>-/-</sup> Control #5 | 115.0 | 3.9 | 126.0 | 6.9  |
| Fgf21 <sup>-/-</sup> Control #6 | 106.1 | 4.4 | 126.7 | 5.7  |
| Fgf21 <sup>-/-</sup> Control #7 | 109.7 | 5.2 | 130.8 | 6.7  |
| Average                         | 108.1 | 5.0 | 127.4 | 7.9  |

| Nighttime<br>"Not walking"  | D1    |     | D2    |      |
|-----------------------------|-------|-----|-------|------|
|                             | Mean  | SD  | Mean  | SD   |
| Fgf21 <sup>-/-</sup> CKD #1 | 93.0  | 9.1 | 119.0 | 10.0 |
| Fgf21 <sup>-/-</sup> CKD #2 | 104.0 | 5.2 | 130.0 | 9.0  |
| Fgf21 <sup>-/-</sup> CKD #3 | 116.3 | 5.1 | 138.8 | 8.0  |
| Fgf21 <sup>-/-</sup> CKD #4 | 105.9 | 6.6 | 137.4 | 10.1 |
| Fgf21 <sup>-/-</sup> CKD #5 | 95.0  | 5.0 | 116.5 | 8.3  |
| Fgf21 <sup>-/-</sup> CKD #6 | 102.0 | 6.9 | 123.0 | 6.9  |
| Fgf21 <sup>-/-</sup> CKD #7 | 107.0 | 6.3 | 134.6 | 5.8  |
| Average                     | 103.3 | 6.3 | 128.5 | 8.3  |

| Nighttime<br>"Not walking" | D1    |     | D2    |     |
|----------------------------|-------|-----|-------|-----|
|                            | Mean  | SD  | Mean  | SD  |
| WT AAV8-LacZ #1            | 107.5 | 5.6 | 129.3 | 7.1 |
| WT AAV8-LacZ #2            | 109.0 | 5.8 | 126.6 | 6.1 |
| WT AAV8-LacZ #3            | 119.0 | 8.0 | 147.3 | 4.2 |
| WT AAV8-LacZ #4            | 105.0 | 6.5 | 122.5 | 9.0 |
| WT AAV8-LacZ #5            | 113.3 | 9.8 | 133.7 | 5.6 |
| WT AAV8-LacZ #6            | 109.4 | 6.4 | 129.0 | 7.1 |
| WT AAV8-LacZ #7            | 109.2 | 6.8 | 128.3 | 6.3 |
| Average                    | 110.3 | 7.0 | 131.0 | 6.5 |

| Nighttime<br>"Not walking" | D1    |     | D2    |     |
|----------------------------|-------|-----|-------|-----|
|                            | Mean  | SD  | Mean  | SD  |
| WT AAV8-FGF21 #1           | 106.8 | 6.3 | 130.3 | 7.1 |
| WT AAV8-FGF21 #2           | 116.7 | 5.6 | 135.2 | 7.4 |
| WT AAV8-FGF21 #3           | 119.4 | 7.0 | 144.2 | 5.3 |
| WT AAV8-FGF21 #4           | 109.1 | 7.0 | 132.6 | 8.8 |
| WT AAV8-FGF21 #5           | 108.8 | 8.6 | 136.7 | 6.1 |
| WT AAV8-FGF21 #6           | 117.5 | 8.0 | 141.8 | 7.3 |
| WT AAV8-FGF21 #7           | 92.0  | 3.2 | 121.8 | 8.0 |
| Average                    | 110.0 | 6.5 | 134.7 | 7.2 |

**Supplementary Table S4. Mean and standard deviation (SD) of D1 and D2 in the Daytime**

| Daytime       | D1    |     | D2    |     |
|---------------|-------|-----|-------|-----|
|               | Mean  | SD  | Mean  | SD  |
| WT Control #1 | 103.0 | 7.0 | 130.0 | 7.6 |
| WT Control #2 | 106.0 | 5.4 | 122.0 | 8.0 |
| WT Control #3 | 96.5  | 6.0 | 119.5 | 5.9 |
| WT Control #4 | 99.9  | 5.7 | 124.0 | 9.8 |
| WT Control #5 | 100.8 | 6.1 | 128.6 | 7.8 |
| WT Control #6 | 102.0 | 6.1 | 123.3 | 7.8 |
| WT Control #7 | 101.2 | 5.6 | 121.0 | 9.9 |
| Average       | 101.3 | 6.0 | 124.1 | 8.1 |

| Daytime   | D1    |      | D2    |      |
|-----------|-------|------|-------|------|
|           | Mean  | SD   | Mean  | SD   |
| WT CKD #1 | 104.5 | 7.5  | 134.0 | 6.5  |
| WT CKD #2 | 102.0 | 11.3 | 129.0 | 9.1  |
| WT CKD #3 | 96.5  | 7.5  | 132.6 | 20.4 |
| WT CKD #4 | 108.6 | 5.4  | 143.0 | 10.3 |
| WT CKD #5 | 98.3  | 6.7  | 131.4 | 11.6 |
| WT CKD #6 | 103.8 | 7.5  | 136.0 | 6.9  |
| WT CKD #7 | 106.7 | 5.2  | 130.1 | 5.8  |
| Average   | 102.9 | 7.3  | 133.7 | 10.1 |

| Daytime                         | D1    |      | D2    |      |
|---------------------------------|-------|------|-------|------|
|                                 | Mean  | SD   | Mean  | SD   |
| Fgf21 <sup>-/-</sup> Control #1 | 98.0  | 7.4  | 126.5 | 6.1  |
| Fgf21 <sup>-/-</sup> Control #2 | 92.0  | 7.8  | 125.0 | 13.0 |
| Fgf21 <sup>-/-</sup> Control #3 | 127.9 | 13.2 | 103.6 | 6.6  |
| Fgf21 <sup>-/-</sup> Control #4 | 133.0 | 9.1  | 104.8 | 5.6  |
| Fgf21 <sup>-/-</sup> Control #5 | 104.0 | 6.1  | 123.0 | 8.1  |
| Fgf21 <sup>-/-</sup> Control #6 | 100.0 | 4.9  | 125.0 | 6.9  |
| Fgf21 <sup>-/-</sup> Control #7 | 100.0 | 4.9  | 127.0 | 6.1  |
| Average                         | 107.8 | 7.6  | 119.3 | 7.5  |

| Daytime                     | D1    |     | D2    |      |
|-----------------------------|-------|-----|-------|------|
|                             | Mean  | SD  | Mean  | SD   |
| Fgf21 <sup>-/-</sup> CKD #1 | 86.5  | 7.6 | 113.5 | 12.0 |
| Fgf21 <sup>-/-</sup> CKD #2 | 115.1 | 4.6 | 139.3 | 6.1  |
| Fgf21 <sup>-/-</sup> CKD #3 | 135.7 | 9.8 | 103.5 | 6.6  |
| Fgf21 <sup>-/-</sup> CKD #4 | 96.0  | 6.6 | 126.0 | 8.9  |
| Fgf21 <sup>-/-</sup> CKD #5 | 113.0 | 4.4 | 137.7 | 7.1  |
| Fgf21 <sup>-/-</sup> CKD #6 | 102.5 | 6.8 | 130.5 | 6.5  |
| Fgf21 <sup>-/-</sup> CKD #7 | 105.0 | 9.1 | 131.0 | 8.4  |
| Average                     | 107.7 | 7.0 | 125.9 | 7.9  |

| Daytime         | D1    |     | D2    |     |
|-----------------|-------|-----|-------|-----|
|                 | Mean  | SD  | Mean  | SD  |
| WT AAV8-LacZ #1 | 102.1 | 6.8 | 132.0 | 7.2 |
| WT AAV8-LacZ #2 | 112.7 | 5.2 | 128.1 | 5.8 |
| WT AAV8-LacZ #3 | 97.0  | 6.8 | 115.8 | 8.4 |
| WT AAV8-LacZ #4 | 100.3 | 7.2 | 124.4 | 6.8 |
| WT AAV8-LacZ #5 | 104.9 | 7.7 | 131.7 | 6.1 |
| WT AAV8-LacZ #6 | 106.2 | 8.1 | 131.2 | 6.9 |
| WT AAV8-LacZ #7 | 103.0 | 7.3 | 127.0 | 8.2 |
| Average         | 103.7 | 7.0 | 127.2 | 7.1 |

| Daytime          | D1    |      | D2    |      |
|------------------|-------|------|-------|------|
|                  | Mean  | SD   | Mean  | SD   |
| WT AAV8-FGF21 #1 | 95.0  | 6.0  | 121.0 | 6.9  |
| WT AAV8-FGF21 #2 | 95.0  | 5.5  | 124.0 | 7.0  |
| WT AAV8-FGF21 #3 | 107.6 | 6.3  | 134.8 | 6.3  |
| WT AAV8-FGF21 #4 | 97.0  | 6.4  | 125.0 | 6.0  |
| WT AAV8-FGF21 #5 | 111.2 | 15.6 | 152.7 | 17.3 |
| WT AAV8-FGF21 #6 | 117.0 | 9.7  | 142.0 | 4.5  |
| WT AAV8-FGF21 #7 | 95.0  | 8.5  | 131.0 | 6.5  |
| Average          | 102.5 | 8.3  | 132.9 | 7.8  |

**Supplementary Table S5. Mean and standard deviation (SD) of D1 and D2 during “walking” in the daytime**

| Daytime<br>“Walking” | D1   |    | D2    |      |
|----------------------|------|----|-------|------|
|                      | Mean | SD | Mean  | SD   |
| WT Control #1        | -    | -  | 124.7 | 11.9 |
| WT Control #2        | -    | -  | 121.8 | 7.1  |
| WT Control #3        | -    | -  | 117.6 | 7.3  |
| WT Control #4        | -    | -  | 126.7 | 5.3  |
| WT Control #5        | -    | -  | 127.9 | 8.2  |
| WT Control #6        | -    | -  | 125.1 | 9.0  |
| WT Control #7        | -    | -  | 123.3 | 13.2 |
| Average              |      |    | 123.9 | 8.8  |

| Daytime<br>“Walking” | D1   |    | D2    |      |
|----------------------|------|----|-------|------|
|                      | Mean | SD | Mean  | SD   |
| WT CKD #1            | -    | -  | 134.4 | 7.3  |
| WT CKD #2            | -    | -  | 119.6 | 15.3 |
| WT CKD #3            | -    | -  | 141.1 | 11.8 |
| WT CKD #4            | -    | -  | 143.6 | 5.6  |
| WT CKD #5            | -    | -  | 134.3 | 8.1  |
| WT CKD #6            | -    | -  | 136.8 | 8.3  |
| WT CKD #7            | -    | -  | 131.0 | 6.8  |
| Average              |      |    | 134.4 | 9.0  |

| Daytime<br>“Walking”            | D1   |    | D2    |      |
|---------------------------------|------|----|-------|------|
|                                 | Mean | SD | Mean  | SD   |
| Fgf21 <sup>-/-</sup> Control #1 | -    | -  | 127.0 | 7.6  |
| Fgf21 <sup>-/-</sup> Control #2 | -    | -  | 125.9 | 12.4 |
| Fgf21 <sup>-/-</sup> Control #3 | -    | -  | 127.7 | 13.5 |
| Fgf21 <sup>-/-</sup> Control #4 | -    | -  | 134.0 | 6.4  |
| Fgf21 <sup>-/-</sup> Control #5 | -    | -  | 126.6 | 7.8  |
| Fgf21 <sup>-/-</sup> Control #6 | -    | -  | 125.4 | 7.4  |
| Fgf21 <sup>-/-</sup> Control #7 | -    | -  | 129.2 | 5.6  |
| Average                         |      |    | 128.0 | 8.7  |

| Daytime<br>"Walking"        | D1   |    | D2    |      |
|-----------------------------|------|----|-------|------|
|                             | Mean | SD | Mean  | SD   |
| Fgf21 <sup>-/-</sup> CKD #1 | -    | -  | 109.2 | 17.0 |
| Fgf21 <sup>-/-</sup> CKD #2 | -    | -  | 138.4 | 5.8  |
| Fgf21 <sup>-/-</sup> CKD #3 | -    | -  | 134.4 | 6.7  |
| Fgf21 <sup>-/-</sup> CKD #4 | -    | -  | 125.7 | 7.7  |
| Fgf21 <sup>-/-</sup> CKD #5 | -    | -  | 142.8 | 5.5  |
| Fgf21 <sup>-/-</sup> CKD #6 | -    | -  | 124.6 | 11.0 |
| Fgf21 <sup>-/-</sup> CKD #7 | -    | -  | 130.7 | 6.7  |
| Average                     |      |    | 129.4 | 8.6  |

| Daytime<br>"Walking" | D1   |    | D2    |      |
|----------------------|------|----|-------|------|
|                      | Mean | SD | Mean  | SD   |
| WT AAV8-LacZ #1      | -    | -  | 130.5 | 8.0  |
| WT AAV8-LacZ #2      | -    | -  | 125.9 | 7.7  |
| WT AAV8-LacZ #3      | -    | -  | 115.2 | 11.1 |
| WT AAV8-LacZ #4      | -    | -  | 125.9 | 5.9  |
| WT AAV8-LacZ #5      | -    | -  | 128.6 | 9.4  |
| WT AAV8-LacZ #6      | -    | -  | 127.8 | 9.5  |
| WT AAV8-LacZ #7      | -    | -  | 127.0 | 9.0  |
| Average              |      |    | 125.8 | 8.7  |

| Daytime<br>"Walking" | D1   |    | D2    |      |
|----------------------|------|----|-------|------|
|                      | Mean | SD | Mean  | SD   |
| WT AAV8-FGF21 #1     | -    | -  | 121.6 | 6.6  |
| WT AAV8-FGF21 #2     | -    | -  | 125.1 | 7.7  |
| WT AAV8-FGF21 #3     | -    | -  | 133.8 | 6.5  |
| WT AAV8-FGF21 #4     | -    | -  | 125.9 | 4.8  |
| WT AAV8-FGF21 #5     | -    | -  | 154.6 | 20.9 |
| WT AAV8-FGF21 #6     | -    | -  | 139.3 | 5.9  |
| WT AAV8-FGF21 #7     | -    | -  | 130.3 | 6.5  |
| Average              |      |    | 132.9 | 8.4  |

**Supplementary Table S6. Mean and standard deviation (SD) of D1 and D2 during “not walking” in the daytime**

| Daytime<br>“Not walking” | D1    |     | D2    |      |
|--------------------------|-------|-----|-------|------|
|                          | Mean  | SD  | Mean  | SD   |
| WT Control #1            | 103.1 | 6.4 | 127.6 | 11.1 |
| WT Control #2            | 107.0 | 6.6 | 127.0 | 6.3  |
| WT Control #3            | 96.8  | 5.7 | 119.9 | 6.0  |
| WT Control #4            | 99.6  | 6.3 | 123.3 | 9.2  |
| WT Control #5            | 100.3 | 6.1 | 128.6 | 8.1  |
| WT Control #6            | 102.0 | 6.1 | 123.3 | 8.1  |
| WT Control #7            | 100.2 | 5.7 | 122.0 | 9.9  |
| Average                  | 101.3 | 6.1 | 124.5 | 8.4  |

| Daytime<br>“Not walking” | D1    |      | D2    |      |
|--------------------------|-------|------|-------|------|
|                          | Mean  | SD   | Mean  | SD   |
| WT CKD #1                | 103.2 | 7.4  | 132.4 | 7.6  |
| WT CKD #2                | 105.4 | 11.6 | 132.0 | 8.4  |
| WT CKD #3                | 105.0 | 11.2 | 142.3 | 13.5 |
| WT CKD #4                | 106.8 | 4.1  | 135.4 | 18.6 |
| WT CKD #5                | 97.5  | 7.0  | 133.5 | 8.0  |
| WT CKD #6                | 104.5 | 7.2  | 136.0 | 6.8  |
| WT CKD #7                | 106.7 | 4.9  | 129.5 | 5.5  |
| Average                  | 104.2 | 7.6  | 134.4 | 9.8  |

| Daytime<br>“Not walking”        | D1    |     | D2    |      |
|---------------------------------|-------|-----|-------|------|
|                                 | Mean  | SD  | Mean  | SD   |
| Fgf21 <sup>-/-</sup> Control #1 | 98.0  | 7.4 | 126.0 | 5.8  |
| Fgf21 <sup>-/-</sup> Control #2 | 92.0  | 7.4 | 123.0 | 13.0 |
| Fgf21 <sup>-/-</sup> Control #3 | 103.0 | 6.9 | 120.0 | 16.0 |
| Fgf21 <sup>-/-</sup> Control #4 | 104.0 | 5.5 | 133.0 | 9.2  |
| Fgf21 <sup>-/-</sup> Control #5 | 104.0 | 6.5 | 123.0 | 7.2  |
| Fgf21 <sup>-/-</sup> Control #6 | 99.0  | 4.7 | 125.0 | 6.8  |
| Fgf21 <sup>-/-</sup> Control #7 | 99.5  | 4.7 | 125.0 | 5.9  |
| Average                         | 99.9  | 6.2 | 125.0 | 9.1  |



| Daytime<br>"Not walking"    | D1    |     | D2    |      |
|-----------------------------|-------|-----|-------|------|
|                             | Mean  | SD  | Mean  | SD   |
| Fgf21 <sup>-/-</sup> CKD #1 | 85.0  | 3.6 | 105.1 | 16.1 |
| Fgf21 <sup>-/-</sup> CKD #2 | 115.2 | 4.7 | 138.2 | 5.1  |
| Fgf21 <sup>-/-</sup> CKD #3 | 103.2 | 6.9 | 135.7 | 12.3 |
| Fgf21 <sup>-/-</sup> CKD #4 | 96.0  | 6.5 | 126.5 | 8.9  |
| Fgf21 <sup>-/-</sup> CKD #5 | 113.0 | 4.4 | 135.5 | 5.4  |
| Fgf21 <sup>-/-</sup> CKD #6 | 102.0 | 6.6 | 130.5 | 7.8  |
| Fgf21 <sup>-/-</sup> CKD #7 | 105.0 | 9.1 | 132.0 | 7.2  |
| Average                     | 102.8 | 6.0 | 129.1 | 9.0  |

| Daytime<br>"Not walking" | D1    |     | D2    |     |
|--------------------------|-------|-----|-------|-----|
|                          | Mean  | SD  | Mean  | SD  |
| WT AAV8-LacZ #1          | 102.0 | 6.9 | 132.0 | 7.1 |
| WT AAV8-LacZ #2          | 112.7 | 6.0 | 128.0 | 5.2 |
| WT AAV8-LacZ #3          | 97.0  | 6.8 | 116.0 | 8.4 |
| WT AAV8-LacZ #4          | 100.5 | 7.2 | 125.0 | 6.8 |
| WT AAV8-LacZ #5          | 104.0 | 7.6 | 132.1 | 5.9 |
| WT AAV8-LacZ #6          | 104.0 | 7.6 | 128.0 | 6.8 |
| WT AAV8-LacZ #7          | 103.0 | 7.8 | 128.0 | 6.8 |
| Average                  | 103.3 | 7.1 | 127.0 | 6.7 |

| Daytime<br>"Not walking" | D1    |      | D2    |      |
|--------------------------|-------|------|-------|------|
|                          | Mean  | SD   | Mean  | SD   |
| WT AAV8-FGF21 #1         | 96.0  | 5.8  | 122.3 | 6.5  |
| WT AAV8-FGF21 #2         | 95.0  | 5.5  | 124.0 | 7.0  |
| WT AAV8-FGF21 #3         | 107.6 | 6.3  | 134.8 | 6.3  |
| WT AAV8-FGF21 #4         | 97.0  | 6.4  | 125.0 | 6.0  |
| WT AAV8-FGF21 #5         | 111.2 | 15.6 | 152.7 | 17.3 |
| WT AAV8-FGF21 #6         | 117.0 | 9.7  | 142.0 | 4.5  |
| WT AAV8-FGF21 #7         | 95.0  | 8.5  | 131.0 | 6.5  |
| Average                  | 103.3 | 7.1  | 127.0 | 6.7  |

**Supplementary Table S7. Characteristics of selected participants (n =185)**

| Variables                            | Total      |
|--------------------------------------|------------|
| Age (years)                          | 65 ± 8     |
| Women, n (%)                         | 108 (58)   |
| Body mass index (kg/m <sup>2</sup> ) | 22.9 ± 3.4 |
| Visceral fat (cm <sup>2</sup> )*     | 60 ± 31    |
| eGFR (mL/min/1.73m <sup>2</sup> )    | 67 ± 20    |
| Systolic blood pressure (mmHg)       | 125 ± 16   |
| Diastolic blood pressure (mmHg)      | 76 ± 10    |
| Carotid-femoral PWV (cm/sec)         | 992 ± 213  |
| Baroreflex sensitivity (ms/mmHg)     | 5.3 ± 3.0  |
| Serum FGF21 levels (pg/mL)           | 135 ± 148  |
| Anti-hypertensive medication, n (%)  | 79 (43)    |
| Current smoking status, n (%)        | 3 (2)      |

Data are presented as the means ± SD or frequency counts (%). eGFR, average value of estimated glomerular filtration rate calculated from serum creatinine or cystatin C; PWV, pulse wave velocity; FGF21, fibroblast growth factor-21. \*N= 184.

**Supplementary Table S8. Independent determinates of baroreflex sensitivity**

| Variables                     | B      | ± | SE    | β      | P       |
|-------------------------------|--------|---|-------|--------|---------|
| <b>R<sup>2</sup> =0.144</b>   |        |   |       |        |         |
| Gender (woman)                | -0.157 | ± | 0.035 | -0.318 | < 0.001 |
| Age (years)                   | -0.003 | ± | 0.002 | -0.113 | 0.130   |
| Serum FGF21 levels (pg/mL)*   | -0.082 | ± | 0.050 | -0.120 | 0.100   |
| Carotid-femoral PWV (cm/sec)* | -0.441 | ± | 0.218 | -0.157 | 0.044   |

Covariates in the stepwise linear regression model included age, gender (woman), body mass index, visceral fat (N = 184), eGFR, current smoking status, anti-hypertensive medication, and serum FGF21 levels. Abbreviations: eGFR, average of estimated glomerular filtration rate calculated from serum creatinine and that from cystatin C; PWV, pulse wave velocity. \*Log-transformed.

**Supplementary Table S9. Primers used for quantitative RT-PCR**

|             | Forward                | Reverse                  |
|-------------|------------------------|--------------------------|
| Osteopontin | TCCAAAGAGAGCCAGGAGAG   | GGCTTTGGAAGTTGCTTGAC     |
| Ngal        | GAAATATGCACAGGTATCCTC  | GTAATTTTGAAGTATTGCTTGTTT |
| MCP1        | GGCTCAGCCAGATGCAGTTAAC | GCCTACTCATTGGGATCATCTTG  |
| Runx2       | TCTGGGAGGAAGGAGAGACA   | GACTCTGTAAGCGGGTCTGC     |
| Osteocalcin | TGCCCTAAAGCCAAACTCTG   | ACTTGCAGGGCAGAGAGAGA     |
| Cyclophilin | TGGAGAGCACCAAGACAGACA  | TGCCGGAGTCGACAATGAT      |
